# Supplementary material for: Whole-exome Sequencing of Prostate Cancer in Sardinian Identify Recurrent UDP-glucuronosyltransferase Amplifications
Source: PubMed Central journal article supplement (PMC7738997; doi:10.7150/jca.48433), 2021-01-01
Supplement: jcav12p0438s1.pdf [file jcav12p0438s1.pdf]

## **Supplementary Information**

### **Supplementary Table and Figure legends**

**Table S1 Primers for detection of ERG fusion**

| Mutation ID | 5' Partner Gene |                    |                     | 3' Partner Gene |                     |                     | Forward Primer              | Reverse Prime               |
|-------------|-----------------|--------------------|---------------------|-----------------|---------------------|---------------------|-----------------------------|-----------------------------|
|             | Gene Name       | Last Observed Exon | Inferred Breakpoint | Gene Name       | First Observed Exon | Inferred Breakpoint |                             |                             |
| COSF125     | TMPRSS2         | 1(utr)             | 79                  | ERG             | 4                   | 312                 | F:GCTAAGCAGGAGGCGGAGGC      | R:CGTAGGCACACTCAAACAACGACTG |
| COSF128     | TMPRSS2         | 2                  | 150                 | ERG             | 4                   | 312                 | F:GATAACAGCAAGATGGCTTTGAACT | R:TAGGCACACTCAAACAACGACTGGT |
| COSF123     | TMPRSS2         | 1(utr)             | 79                  | ERG             | 2(utr)              | 124                 | F:GCTAAGCAGGAGGCGGAGGC      | R:CGTAGGCACACTCAAACAACGACTG |
| COSF126     | TMPRSS2         | 1(utr)             | 79                  | ERG             | 5                   | 530                 | F:CTAAGCAGGAGGCGGAGGCGGAGGC | R:GCTGCCACCACATCTCCCGCCTTG  |
| COSF127     | TMPRSS2         | 2                  | 150                 | ERG             | 2(utr)              | 124                 | F:GATAACAGCAAGATGGCTTTGAACT | R:TAGGCACACTCAAACAACGACTGGT |

**Supplementary Table S2 Comparison of chromosome 4q13.2 amplification rate between Sardinian prostate cancer cohort and the other 13 prostate cancer genomic studies**

| Projects                   | Primary or Metastaic tumor | Total cases (n) | Cases with 4q13.2 amplification (n) | Cases In Sarinian Cohort (n) | 4q13.2 amplification cases in Sardinian Cohort(n) | Pval (Fisher Test) |
|----------------------------|----------------------------|-----------------|-------------------------------------|------------------------------|---------------------------------------------------|--------------------|
| PRAD(MSKCC/DFCI2018)       | Primay & Metastaic         | 1013            | 15                                  | 30                           | 6                                                 | 1.35E-05           |
| Prostate(SU2C2019)         | Metastaic                  | 444             | 6                                   | 30                           | 6                                                 | 2.74E-05           |
| Prostate(TCGA)             | Primay                     | 497             | 1                                   | 30                           | 6                                                 | 1.38E-07           |
| Prostate(SU2C)             | Metastaic                  | 150             | 1                                   | 30                           | 6                                                 | 8.44E-05           |
| Prostate(MSKCC2010)        | Primay                     | 240             | 0                                   | 30                           | 6                                                 | 1.17E-06           |
| Prostate(FHCRC,2016)       | Primay                     | 176             | 0                                   | 30                           | 6                                                 | 6.02E-06           |
| Prostate(MSKCC2014)        | Primay                     | 104             | 0                                   | 30                           | 6                                                 | 8.27E-05           |
| MSK-IMPACT Prostate        | Metastatic                 | 424             | 0                                   | 30                           | 6                                                 | 5.05E-08           |
| Prostate(Broad/Comell2012) | Primay                     | 112             | 0                                   | 30                           | 6                                                 | 5.80E-05           |
| Prostate(Eur Urol2017)     | Primay                     | 65              | 0                                   | 30                           | 6                                                 | 6.83E-04           |
| Prostate(MICH)             | Metastaic                  | 61              | 3                                   | 30                           | 6                                                 | 5.46E-02           |
| Prostate(Broad/Comell2013) | Metastaic                  | 56              | 3                                   | 30                           | 6                                                 | 5.98E-02           |
| The MPC Project            | Metastaic                  | 19              | 1                                   | 30                           | 6                                                 | 2.24E-01           |

**Supplementary Figures S1-6 (pdf):**

**A**

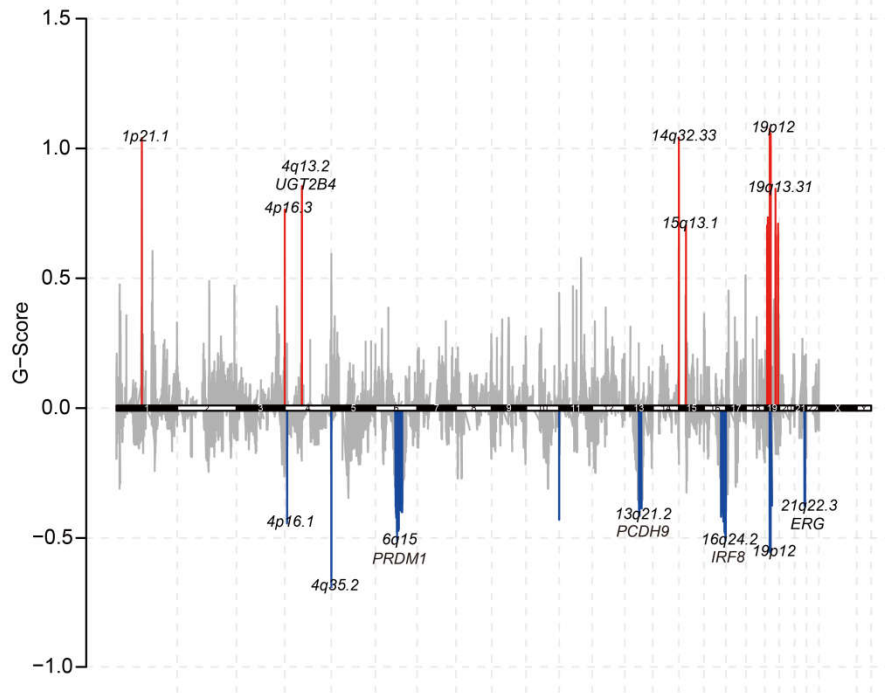

**B**

|                  |              |           |          |                  |                |                   |                  |
|------------------|--------------|-----------|----------|------------------|----------------|-------------------|------------------|
| cytoband         | 1p21.1       | 14q32.33  | 19p12    | 19q13.31         | 4p16.3         | 4q13.2            | 15q13.1          |
| q value          | 2.95E-05     | 2.95E-05  | 2.95E-05 | 4.07E-04         | 1.85E-03       | 3.66E-04          | 4.65E-03         |
| residual q value | 2.95E-05     | 2.95E-05  | 1.98E-04 | 4.07E-04         | 1.85E-03       | 4.38E-03          | 4.65E-03         |
| genes in peak    | AMY1A, AMY1B | LINC00226 | UQCRFS1  | CEACAM1, CEACAM8 | ZNF595, ZNF718 | UGT2B4, UGT2B7    | GOLGA8G, GOLGA8F |
| is oncogene      | no           | no        | no       | no               | no             | steroid synthesis | no               |

**C**

|                  |                 |          |          |          |            |              |          |          |
|------------------|-----------------|----------|----------|----------|------------|--------------|----------|----------|
| cytoband         | 4q35.2          | 19p12    | 6q15     | 16q24.2  | 4p16.1     | 13q21.2      | 21q22.3  | 8p23.1   |
| q value          | 3.15E-06        | 1.95E-04 | 4.35E-04 | 4.30E-04 | 1.98E-03   | 3.74E-03     | 7.99E-03 | 1.44E-01 |
| residual q value | 3.15E-06        | 1.95E-04 | 4.35E-04 | 4.35E-04 | 1.98E-03   | 3.74E-03     | 7.99E-03 | 1.44E-01 |
| genes in peak    | DUX4, DUX2      | UQCRFS1  | PRDM1    | IRF8     | DRD5, HMX1 | PCDH9, PCDH8 | ERG      | NKX3-1   |
| is TSG           | repeat sequence | no       | yes      | yes      | no         | yes          | fusion   | yes      |

**Figure S1. G-score across the whole exome region of 30 Sardinian prostate cancers.** G-scores were calculated by the GISTIC algorithm to determine the amplitude and the frequency of copy number variation.

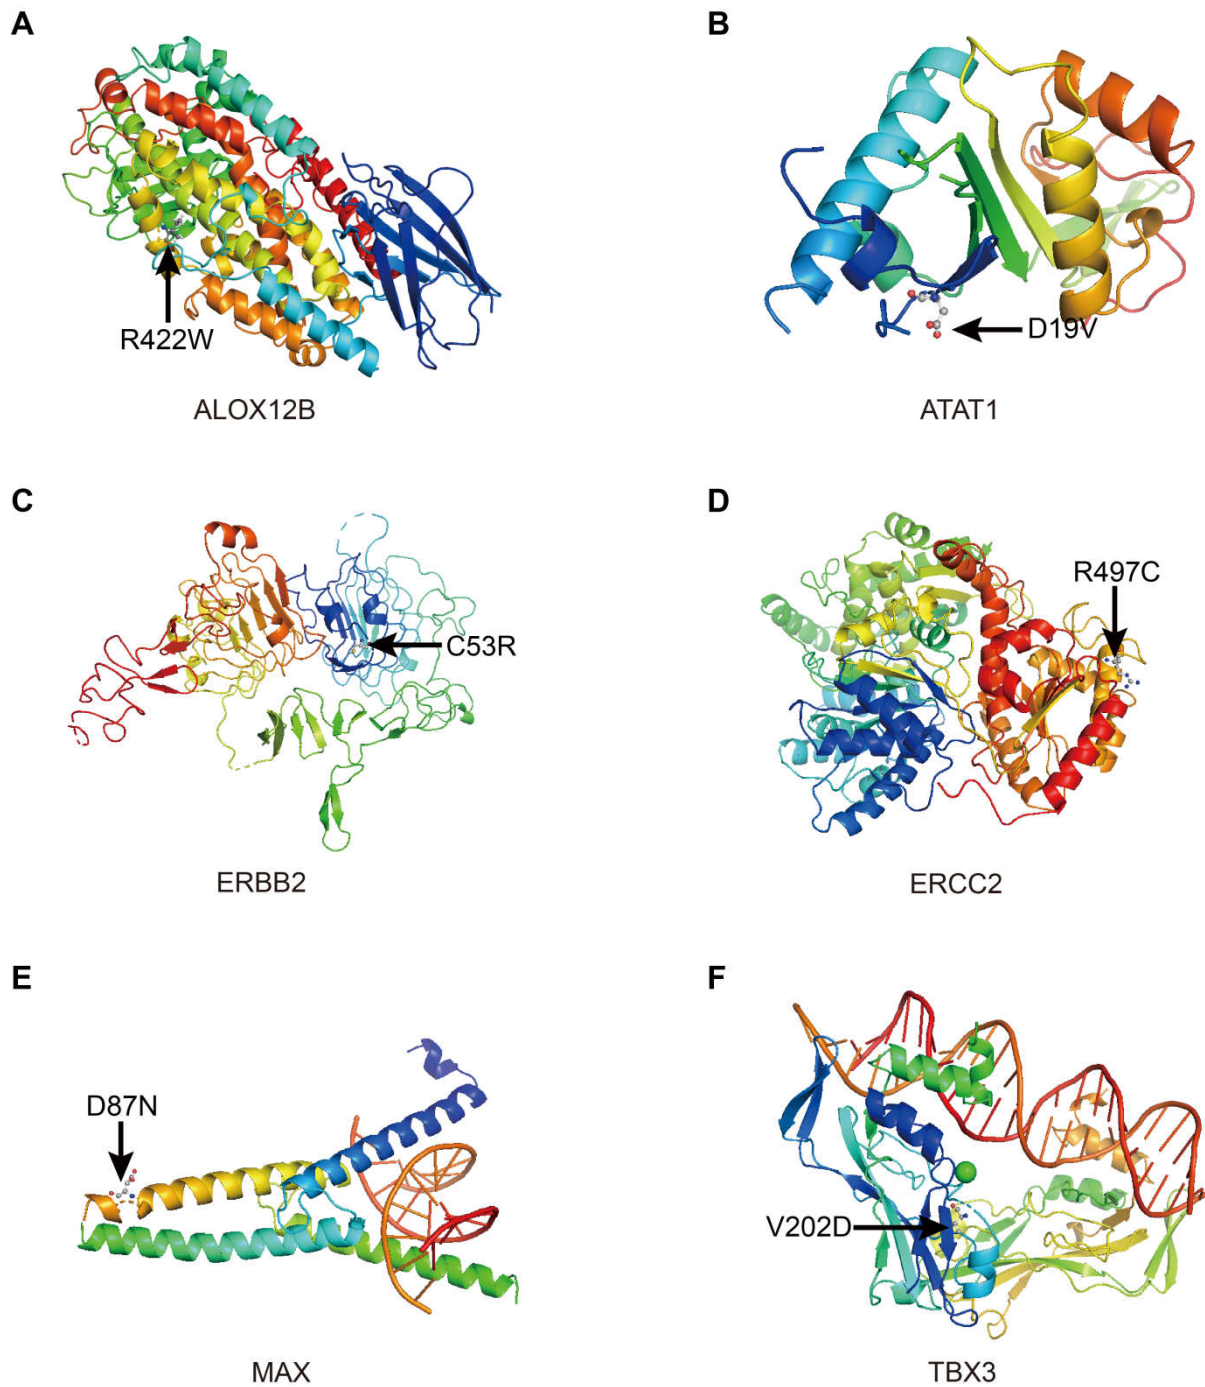

**Figure S2. Ribbon structure of Novel candidate driver mutations.** (A) R422W mutation in the ALOX12B protein. (B) D19V mutation in ATAT1 protein. (C) C53R mutation in the ERBB2 Receptor domain. (D) R497C mutation in the ERCC2 protein. (E) D87N mutation in the MAX protein. (F) V202D mutation in the TBX3 T-box domain.

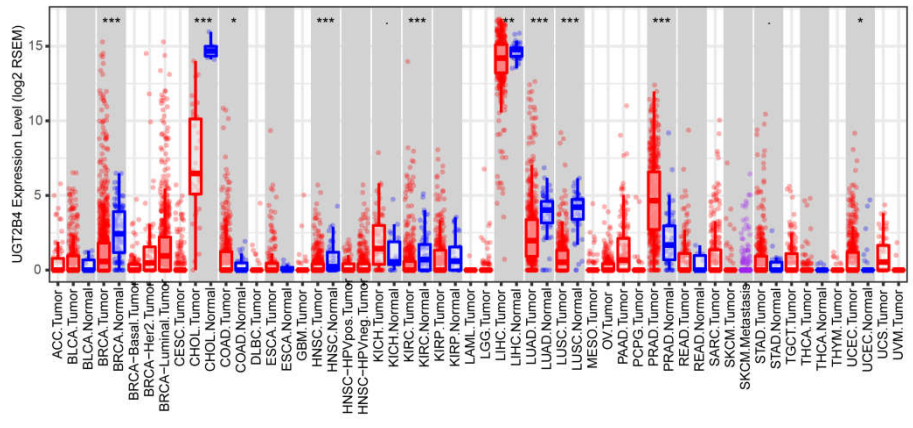

**Figure S3. UGT2B4 expression level in pan-cancer.** UGT2B4 expression level in TCGA pan-cancer cohort was investigated by <https://cistrome.shinyapps.io/timer/>. UGT2B4 was significantly down regulated in breast cancer compared to normal tissues but up regulated in prostate tumors compared with normal prostate tissue.

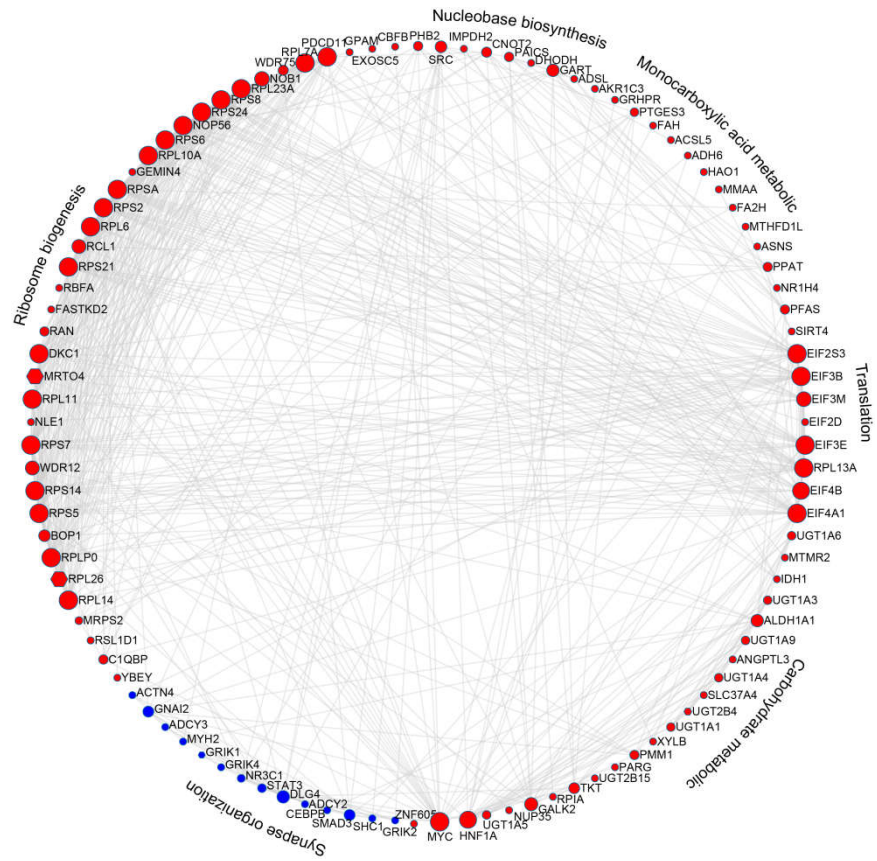

**Figure S4. PPI network of UGT2B4 co-expression genes in prostate cancer.** Protein-Protein interaction network of UGT2B4 co-expressed genes were downloaded from InWeb\_IM (<https://www.intomics.com/>) and visualized by Cytoscape.

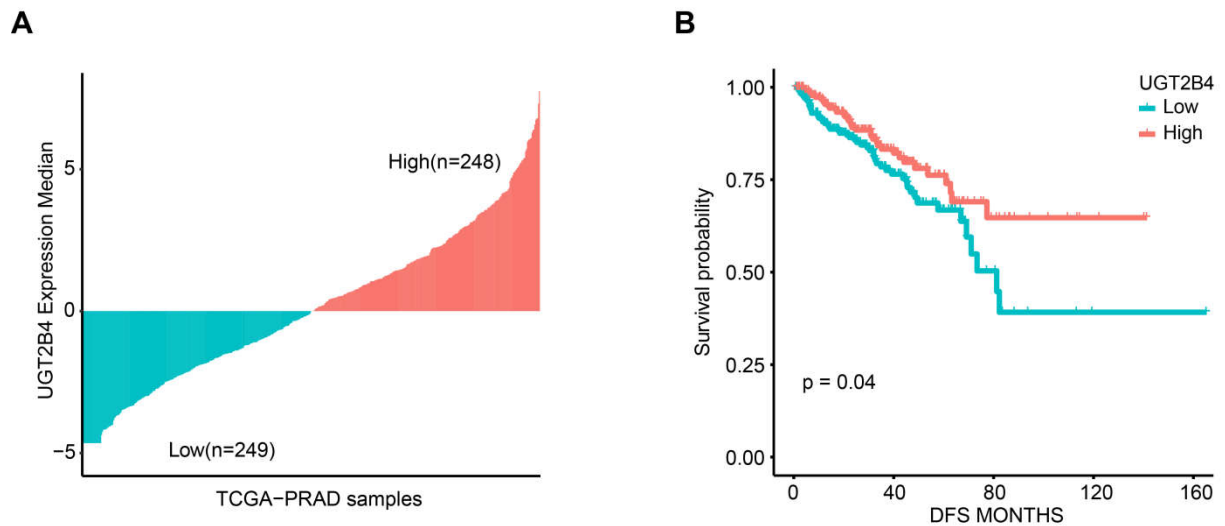

**Figure S5. UGT2B4 expression is a favorable prognosis factor. Patients with high expression of UGT2B4 had longer disease-free survival compared with those patients with low expression of UGT2B4. (A)** All 497 patients from The Cancer Genome Atlas database were grouped by the median UGT2B4 expression level of the cohort. X-axis. **(B)** Kaplan–Meier analysis demonstrated that high UGT2B4 expressers (red) had longer disease-free survival than the low expressers patients (blue)( $p < 0.05$ ).



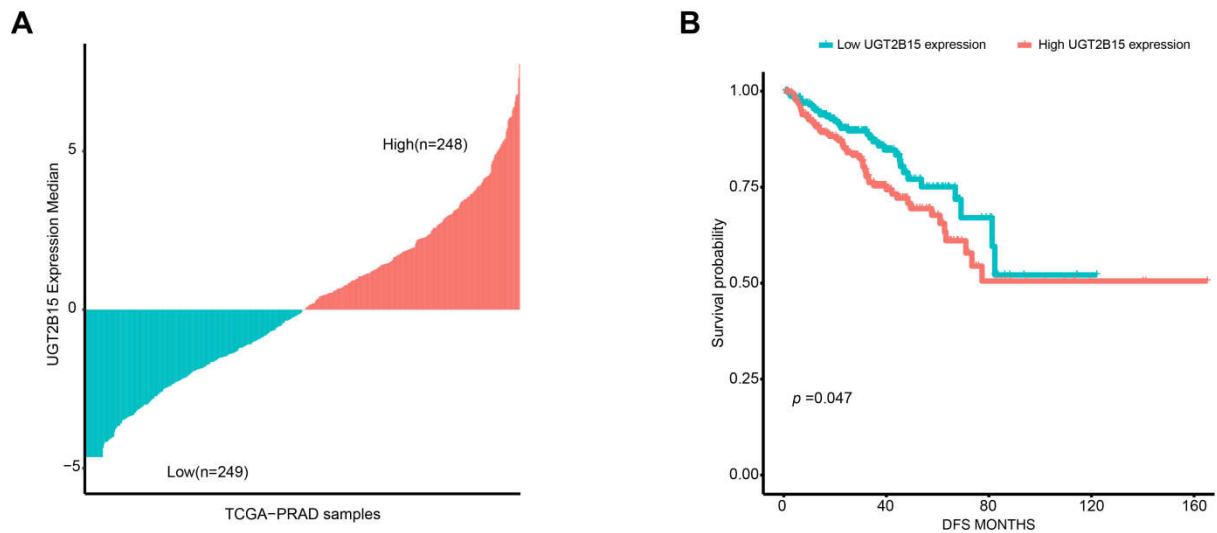

**Figure S6. UGT2B15 expression is an adverse prognosis factor. (A)** All 497 patients from The Cancer Genome Atlas database were grouped by the median UGT2B15 expression level of the cohort. **(B)** Kaplan–Meier analysis demonstrated that high UGT2B15 expressers (red) had shorter disease-free survival than the low expressers patients (blue)( $p < 0.05$ ).
